# Supplementary material
Source: Springer Nature journal article supplement (https://www.springermedizin.de/resource/supplementary/12958_2008_439_MOESM1_ESM.pdf/9567888)

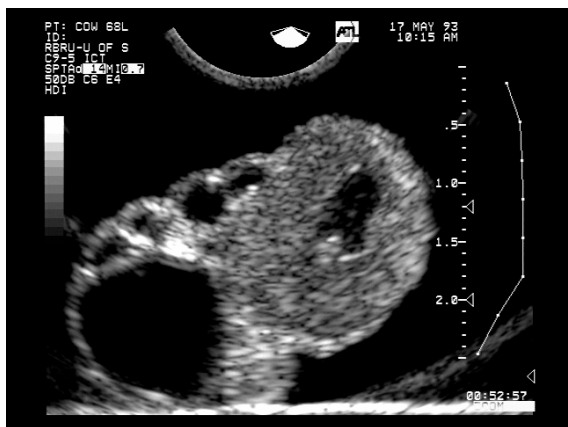

(a)

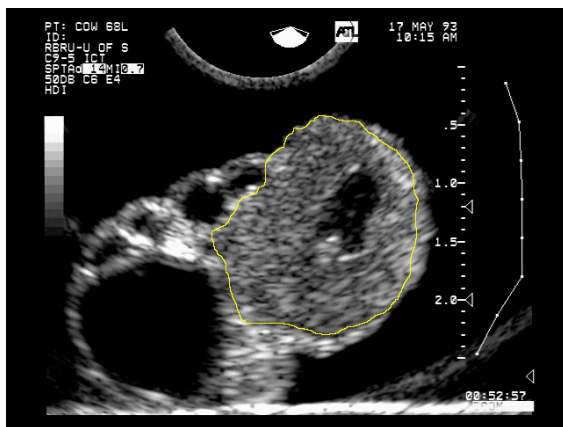

(b)

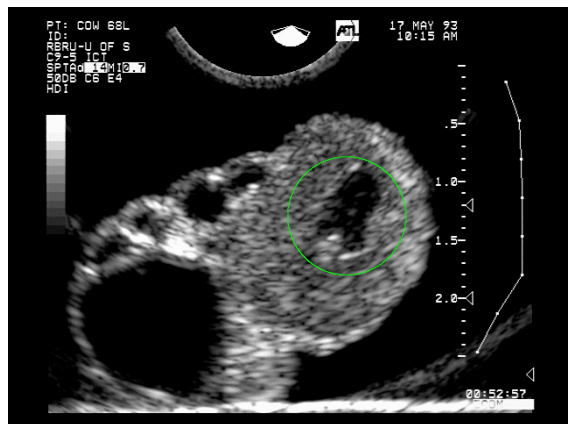

(c)

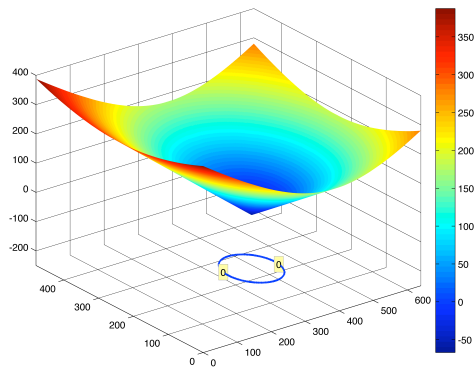

(d)

Supplement: MOESM1 [file 9567888]
